# Supplementary material
Source: Royal Society of Chemistry journal article supplement (doi:10.1039/d6fo01565d)
Supplement: d6fo01565d2.pdf [file d6fo01565d2.pdf]

## Supporting Information

### **Tibetan kefir grain-fermented milk attenuates DSS-induced colitis through coordinated regulation of intestinal barrier function, inflammation, and gut microbiota**

Ben Li <sup>a,1</sup>, Shuai Li <sup>b,1</sup>, Yihao Pei <sup>a</sup>, Xiaojuan Sun <sup>b</sup>, Chen Ding <sup>a</sup>, Jin Yu <sup>c</sup>, Meiling Zhou <sup>c</sup>, Jianmei Han <sup>d,e\*</sup>, Hong Yang <sup>b\*</sup> and Yafan Wan <sup>a\*</sup>

<sup>a</sup> Liaoning Provincial Professional Technology Innovation Center of Meat Processing and Quality-Safety Control, School of Food and Health, Jinzhou Medical University, Jinzhou, China.

<sup>b</sup> School of Life Sciences, Liaoning Provincial Key Laboratory of Biotechnology and Drug Discovery, Liaoning Normal University, Dalian, China.

<sup>c</sup> School of Stomatology, Jinzhou Medical University, Jinzhou, China.

<sup>d</sup> School/Hospital of Stomatology, Guizhou Medical University, Guiyang, China.

<sup>e</sup> Basic Medical College, Guizhou Medical University, Guiyang, China.

1: equal first author

\*Corresponding authors: Jianmei Han ([hanjianmei1232024@163.com](mailto:hanjianmei1232024@163.com)), Hong Yang ([hyanglnnu@126.com](mailto:hyanglnnu@126.com)) and Yafan Wan ([wanyf@jzmu.edu.cn](mailto:wanyf@jzmu.edu.cn)).

**Table S1. Primer sequences of macrophage-related genes.**

| <b>Genes</b>                   | <b>Primer sequences</b>                                                             |
|--------------------------------|-------------------------------------------------------------------------------------|
| <i>TNF-<math>\alpha</math></i> | <b>F: 5'-CATCTTCTCAAATTCGAGTGACAA-3'</b><br><b>R: 5'-TGGGAGTAGACAAGGTACAACCC-3'</b> |
| <i>IL-6</i>                    | <b>F: 5'-TCTATACCACTTCACAAGTCGGA-3'</b><br><b>R: 5'-GAATTGCCATTGCACAACCTTTT-3'</b>  |
| <i>TGF-<math>\beta</math></i>  | <b>F: 5'-CTTCGACGTGACAGACGCT-3'</b><br><b>R: 5'-GCAGGGGCAGTGTAACCTTATT-3'</b>       |

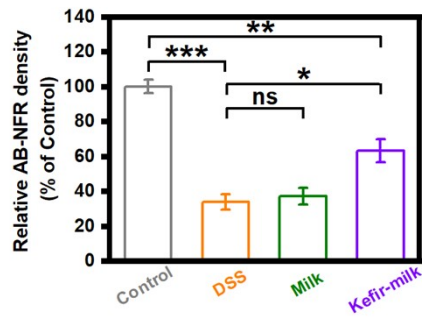

**Figure S1.** Statistical analysis of the AB-NFR density.

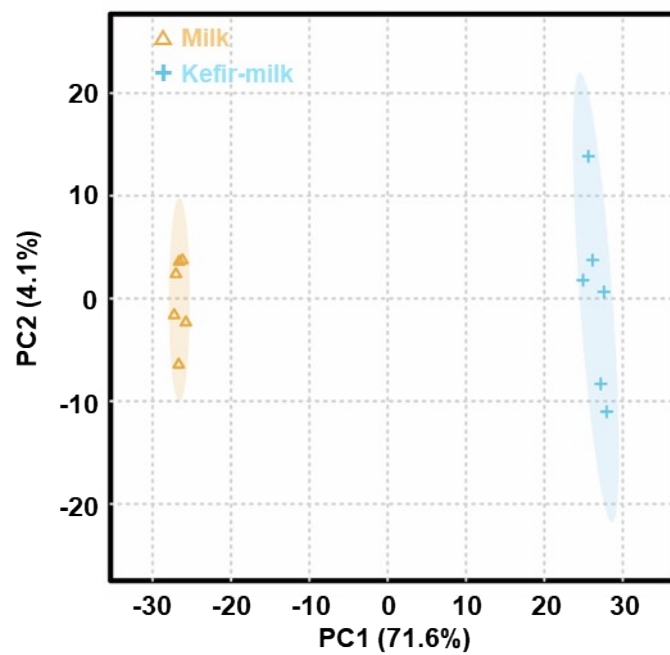

**Figure S2.** Principal Component Analysis (PCA) of positive-ion metabolites between milk and Kefir-milk.

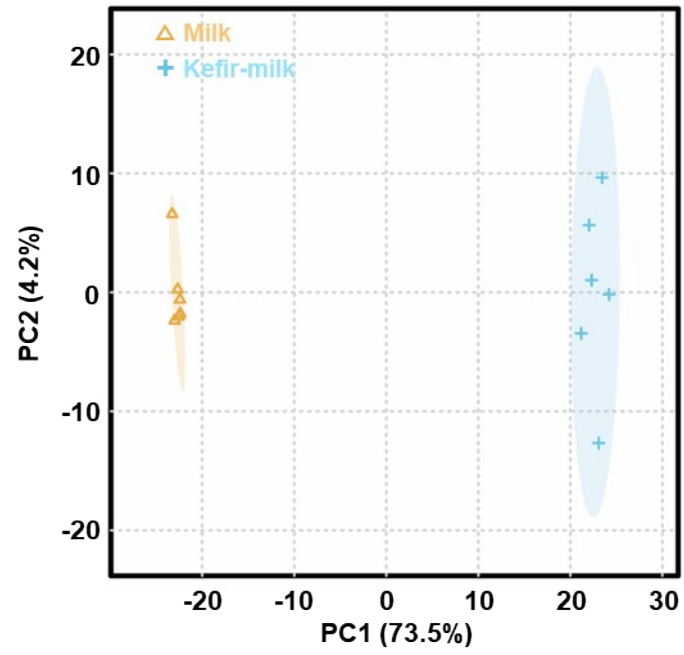

**Figure S3.** PCA of negative-ion metabolites between milk and Kefir-milk.

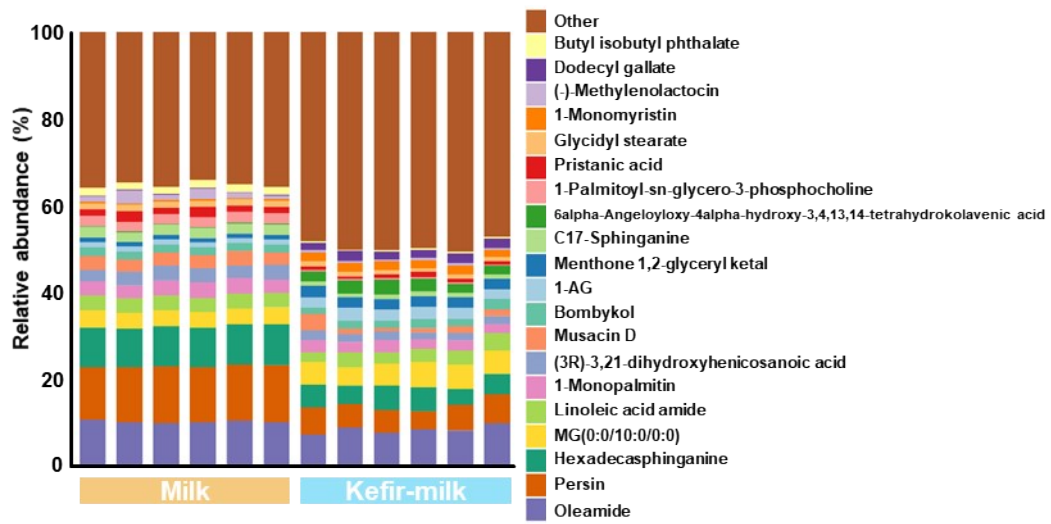

**Figure S4.** Percentage-stacked bar chart of relative abundance positive-ion metabolites at top 20.

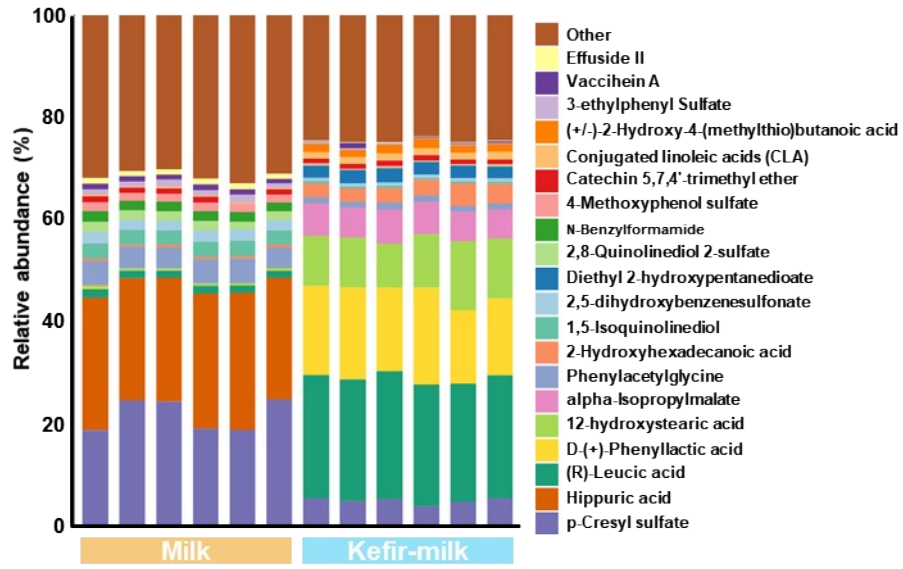

**Figure S5.** Percentage-stacked bar chart of relative abundance negative-ion metabolites at top 20.

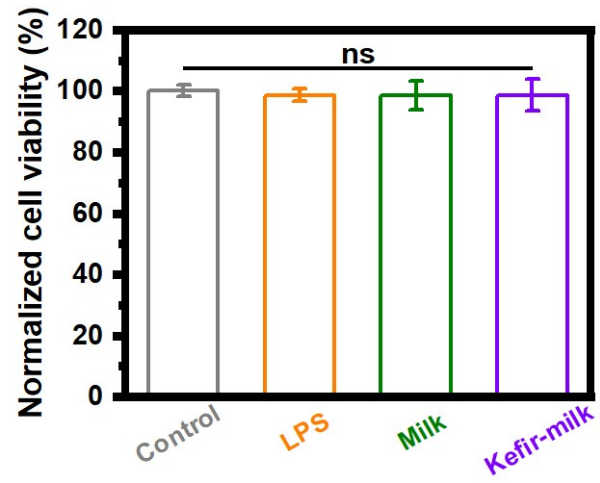

**Figure S6.** Normalized cell viability of LPS-stimulated RAW264.7 macrophages in each group based on CCK-8 assay.

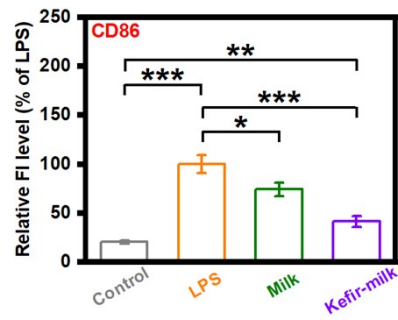

**Figure S7.** Quantitative analysis of CD86 fluorescence intensity in RAW264.7 macrophages under different treatments.

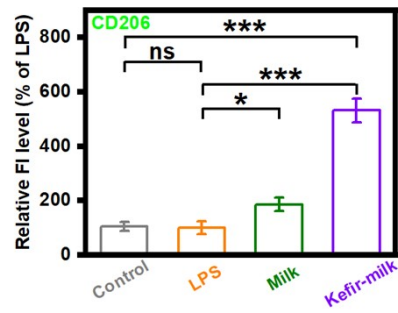

**Figure S8.** Quantitative analysis of CD206 fluorescence intensity in RAW264.7 macrophages under different treatments.

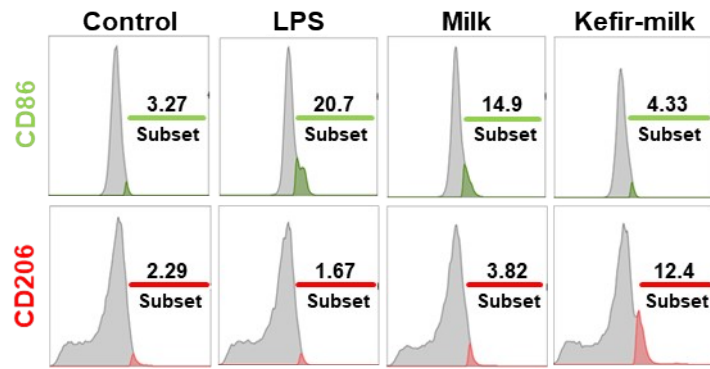

**Figure S9.** Flow cytometry analysis of CD86- and CD206-positive macrophage subsets.
